# Supplementary material for: Evaluating Ecological Inferences from Camera Trap Data: A Comparative Analysis of Two Sampling Designs
Source: Research Square preprint supplement (doi:10.21203/rs.3.rs-6177782/v1), 2025-04-17
Supplement: Supplementary file 1 [file 1bea787694039ed7e557c2f4.docx]

Supplementary table 1: Summary of main differences between the systematic-random sampling design (SYS) and the stratified-random sampling design (STRAT).

| Sampling design | Sampling period | CT number | Sampling location number | Deployment length | Sampling replication |
| --- | --- | --- | --- | --- | --- |
| SYS | May 2017 – May 2020 | 40 | 1040 | 3-4 weeks | Sampling year 2 = Sampling year 3 |
| STRAT | May 2020 – May 2023 | 30 | 60 | 2 months | Two subsets of 30 locations sampled alternatingly |
